# Supplementary material for: Intentional and Unintentional Medication Non-Adherence in Psoriasis: The Role of Patients’ Medication Beliefs and Habit Strength
Source: PubMed Central journal article supplement (PMC5869950; doi:10.1016/j.jid.2017.11.015), 2018-04

## SUPPLEMENTARY MATERIAL

**Table S1. Model fit statistics ( $n = 808$ )**

|                                      | Classes  |          |          |          |          |
|--------------------------------------|----------|----------|----------|----------|----------|
|                                      | 1        | 2        | 3        | 4        | 5        |
| <b>Parameters</b>                    | 10       | 16       | 22       | 28       | 34       |
| <b>LL</b>                            | -4072.81 | -3898.51 | -3827.44 | -3813.86 | -3799.60 |
| <b>BIC</b>                           | 8212.56  | 7904.14  | 7802.16  | 7815.17  | 7826.82  |
| <b>Entropy</b>                       | -        | 0.60     | 0.74     | 0.63     | 0.66     |
| <b>VLMR-LRT <math>p</math> value</b> | -        | 0.00     | 0.00     | 0.20     | 0.17     |
| <b>LMR-LRT <math>p</math> value</b>  | -        | 0.00     | 0.00     | 0.21     | 0.17     |

Abbreviations: LL, Log-likelihood; BIC, Bayesian Information Criterion; VLMR-LRT, Vuong-Lo-Mendell-Rubin Likelihood ratio test; LMR-LRT, Lo-Mendell-Rubin Adjusted Likelihood ratio test.

Footnote: Three participants had missing data for all five variables and were excluded from the analysis.

**Figure S1. Recruitment flowchart**

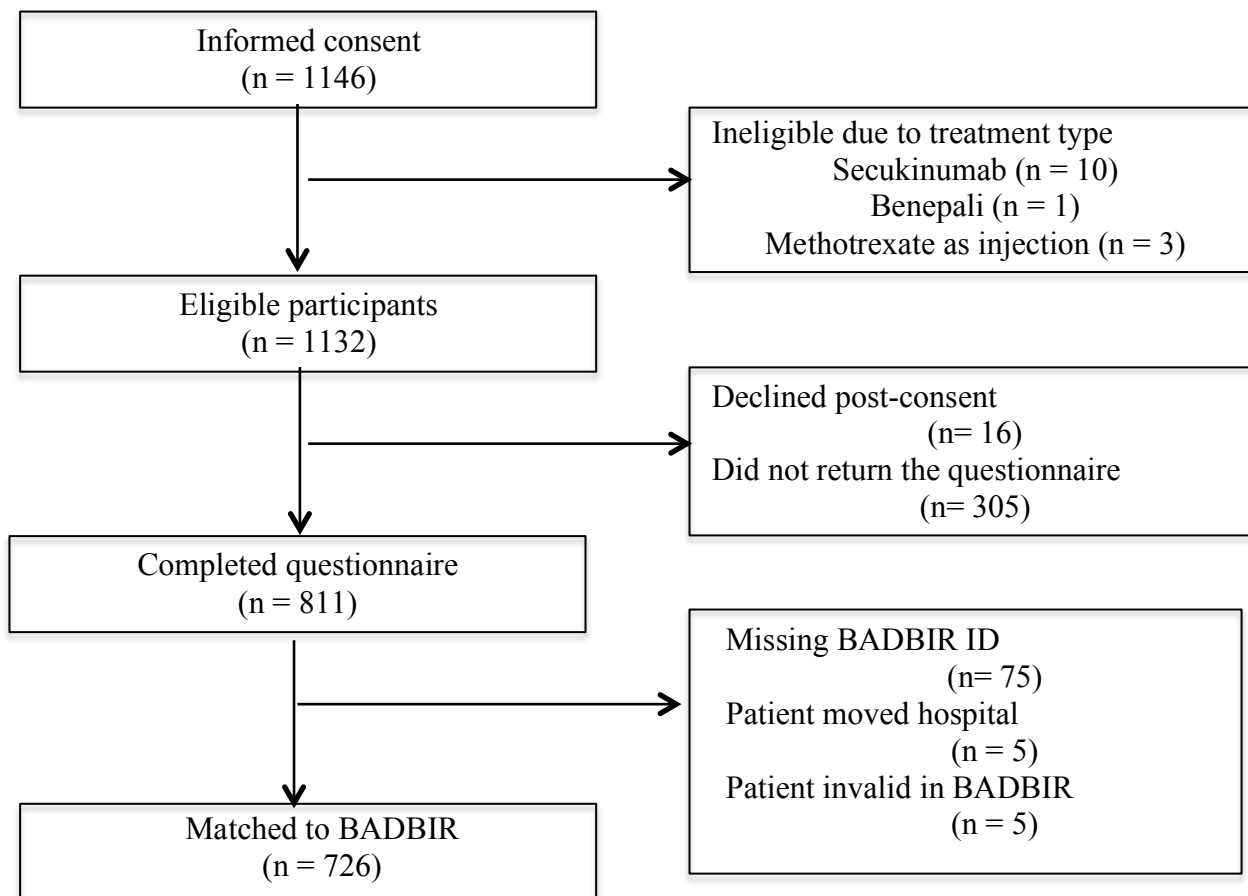

Supplement: mmc1.pdf [file mmc1.pdf]
